# Supplementary material
Source: PubMed Central journal article supplement (PMC4866817)
Supplement: NIHMS758727-supplement-Supplemental_Digital_Content.pdf [file NIHMS758727-supplement-Supplemental_Digital_Content.pdf]

## Supplemental Material

### Brain Anatomy in Latino Farmworkers Exposed to Pesticides and Nicotine

Laurienti, Paul J. MD, PHD; Burdette, Jonathan H. MD; Talton, Jennifer MS; Pope, Carey N. PHD; Summers, Phillip MPH; Walker, Francis O. MD; Quandt, Sara A. PHD; Lyday, Robert G. BS; Chen, Haiying MD, PHD; Howard, Timothy D. PHD; Arcury, Thomas A. PHD

From the Department of Radiology (Drs. Laurienti, Burdette and Mr. Lyday), Department of Biostatistical Sciences (Ms. Talton and Dr Chen), Department of Epidemiology and Prevention (Dr Quandt), Department of Neurology (Dr. Walker), Center for Genomics and Personalized Medicine Research (Dr. Howard), and Department of Family and Community Medicine (Mr. Summers and Dr Arcury), Wake Forest School of Medicine, Winston-Salem, NC; and Department of Physiological Sciences (Dr Pope), Center for Veterinary Sciences, Oklahoma State University, Stillwater.

## Cholinesterase Assay

Blood samples were shipped on dry ice to Oklahoma State University. Total cholinesterase, acetylcholinesterase and butyrylcholinesterase activities were assayed with a modification of the radiometric method of Johnson and Russell (1975) as reported previously (Quandt et al. 2015). To minimize reactivation of cholinesterases, whole blood samples were thawed on ice and assayed individually using a minimal tissue dilution (1:5 in the final reaction). Each sample was assayed in duplicate under two conditions. Immediately after thawing, 20  $\mu$ l aliquots of whole blood were added to four separate 7-ml glass scintillation vials. In two of the vials, 60  $\mu$ l of 50 mM potassium phosphate buffer, pH 7 (phosphate buffer) was added while in the other two, 60  $\mu$ l of the specific acetylcholinesterase inhibitor BW 284C51 in phosphate buffer was added (final concentration 0.5  $\mu$ M; acetylcholinesterase activity was completely inhibited under these conditions). Samples were vortexed, and then placed into a water bath at 26<sup>o</sup>C for 60 seconds before adding 20  $\mu$ l of substrate ([<sup>3</sup>H]acetylcholine iodide, 1 mM final concentration) in phosphate buffer. The reactions were allowed to incubate a further 30 seconds and then terminated by addition of 100  $\mu$ l of acidified buffer (pH 2.5; (Johnson and Russell 1975)). Five ml of an organic scintillation cocktail was then added. Vials were vortexed and allowed to equilibrate overnight before counting. A time-course study was used to estimate total substrate hydrolysis using the nonlinear fit, one phase association program in GraphPad Prism version 5. Activity in unknown samples was then algebraically compared to total substrate hydrolysis (with cpm values of Ymax representing the 100 nmol acetylcholine in each reaction). Total cholinesterase activity was defined as the amount of activity in the samples without BW 284C51, butyrylcholinesterase activity was defined as the amount of activity in the samples incubated with BW 284C51, and acetylcholinesterase activity was defined as the difference in activity between those two conditions.

## Cotinine Assay

The samples were all stored at -80<sup>o</sup>C following collection and were shipped to Salimetrics LLC for the assay on dry ice. Samples collected near the end of the farming season on a work day were used in this analysis. All samples were tested for urinary cotinine in duplicate using a highly-sensitive enzyme immunoassay (Salimetrics LLC, State College, PA, USA). Six (6) standard calibrators ranging from 0.8 ng/mL to 200 ng/mL and two sets of high and low controls with established ranges were run on each test plate were. The test used 20  $\mu$ l of urine sample per determination, and had a lower limit of sensitivity of 0.15 ng/mL, a range of standard curve from 0.8 to 200 ng/mL, an average intra-assay coefficient of variation of 6.4%, and an average inter-assay coefficient of variation of 6.6%. Method accuracy determined by spike recovery averaged 99.6%, and linearity determined by serial dilution averaged 98%.

Assay results for each subject were acceptable when the coefficient of variation (%CV) between the duplicate results (result 1 and result 2) was <15%. In instances where the %CV between duplicates was >15%, results were accepted if the absolute value between result 1 and result 2 was <1.0 ng/mL. Data <0.05 ng/mL were reported as “below lower limit of assay”. Results with low values (based on Optical Density reading) but not returning a number value were reported as “none detected” (ND). Cotinine data were compiled by the testing manager and checked for accuracy by the technical supervisor before final reports were delivered.

## References

- Johnson CD, Russell RL (1975) A rapid, simple radiometric assay for cholinesterase, suitable for multiple determinations *Analytical biochemistry* 64:229-238 doi:10.1016/0003-2697(75)90423-6
- Quandt SA, Pope CN, Chen H, Summers P, Arcury TA (2015) Longitudinal Assessment of Blood Cholinesterase Activities Over 2 Consecutive Years Among Latino Nonfarmworkers and Pesticide-Exposed Farmworkers in North Carolina *J Occup Environ Med* 57:851-857 doi:10.1097/JOM.0000000000000496

| Assay                                     | Group          | N  | Mean    | Std Dev | Minimum | Median | Maximum  | p-value  |
|-------------------------------------------|----------------|----|---------|---------|---------|--------|----------|----------|
| Blood Total Cholinesterase <sup>a</sup>   |                |    |         |         |         |        |          | 0.5611   |
|                                           | Non-farmworker | 26 | 2.05    | 0.39    | 1.34    | 2.15   | 2.63     |          |
|                                           | Farmworker     | 48 | 1.99    | 0.46    | 1.17    | 1.94   | 2.91     |          |
| Blood acetyl-Cholinesterase <sup>a</sup>  |                |    |         |         |         |        |          | 0.6602   |
|                                           | Non-farmworker | 26 | 1.51    | 0.42    | 0.71    | 1.63   | 2.02     |          |
|                                           | Farmworker     | 48 | 1.46    | 0.43    | 0.59    | 1.46   | 2.20     |          |
| Blood butyryl-Cholinesterase <sup>a</sup> |                |    |         |         |         |        |          | 0.6210   |
|                                           | Non-farmworker | 26 | 0.54    | 0.12    | 0.33    | 0.52   | 0.79     |          |
|                                           | Farmworker     | 48 | 0.52    | 0.14    | 0.27    | 0.50   | 0.89     |          |
| Urine Cotinine <sup>b</sup>               |                |    |         |         |         |        |          | < 0.0001 |
|                                           | Non-farmworker | 26 | 288.14  | 996.31  | 0.55    | 2.73   | 4997.20  |          |
|                                           | Farmworker     | 48 | 1602.48 | 2454.17 | 1.09    | 457.73 | 13718.29 |          |

**Supplemental Digital Content, Table S1.** Measures of urine cotinine levels and blood cholinesterase activity.

<sup>a</sup>Blood Cholinesterase Activity ( $\mu\text{mol /min/ml}$ ) summer 2013

<sup>b</sup>Urine Cotinine Levels ( $\text{ng/mL}$  of urine)

| Statistical Contrast | Region                         | Size (# of voxels) | p-value <sup>a</sup> | T score | MNI coordinates (X, Y, Z) <sup>b</sup> |
|----------------------|--------------------------------|--------------------|----------------------|---------|----------------------------------------|
| FW > NFW             |                                |                    |                      |         |                                        |
|                      | Right putamen                  | 874                | 0.006                | 4.49    | 28, 6, 1                               |
|                      | Left cerebellum                | 1170               | 0.002                | 4.20    | -27, -60, -48                          |
|                      | Cerebellar vermis              | 670                | 0.013                | 3.38    | -3, -39, -14                           |
|                      | Left putamen <sup>c</sup>      | 200                | 0.145                | 3.24    | -27, 9, 3                              |
|                      | Right cerebellum               | 322                | 0.070                | 3.92    | 21, -58, -48                           |
| FW < NFW             |                                |                    |                      |         |                                        |
|                      | Right ventrolateral prefrontal | 645                | 0.015                | 4.47    | 51, 15, 19                             |
|                      | Right dorsolateral prefrontal  | 502                | 0.028                | 3.99    | 26, 30, 45                             |
|                      | Right medial prefrontal        | 292                | 0.083                | 3.39    | -4, 48, -21 <sup>d</sup>               |
|                      | Left medial prefrontal         | 1172               | 0.002                | 5.36    | -9, 56, 1                              |
|                      | Right temporal                 | 418                | 0.043                | 3.23    | 70, -28, -12                           |
|                      | Right inferior temporal        | 7                  | 0.813                | 2.75    | 45, -64, -18                           |

**Supplemental Digital Content Table S2.** Regional differences in gray matter controlling for age, total intracranial volume, and average total serum cholinesterase activity.

<sup>a</sup> p-value for comparing farmworkers to non-farmworkers.

<sup>b</sup> MNI (Montreal Neurological Institute) coordinates for peak voxel location.

<sup>c</sup> Indicates that the region in the left putamen was fragmented into many smaller areas. The largest area is noted here.

<sup>d</sup> The region in the right medial prefrontal cortex actually extended into the left hemisphere. The peak location was located on the left but the majority of the area was in the right hemisphere.

FW = farmworker    NFW = non-farmworker

| Statistical Contrast | Region                         | Size (# of voxels) | p-value <sup>a</sup> | T score | MNI coordinates (X, Y, Z) <sup>b</sup> |
|----------------------|--------------------------------|--------------------|----------------------|---------|----------------------------------------|
| FW > NFW             |                                |                    |                      |         |                                        |
|                      | Right putamen                  | 821                | 0.007                | 4.45    | 28, 6, 1                               |
|                      | Left cerebellum                | 1177               | 0.002                | 4.49    | -27, -60, -48                          |
|                      | Cerebellar vermis              | 877                | 0.006                | 3.53    | -3, -39, -14                           |
|                      | Left putamen <sup>c</sup>      | 197                | 0.149                | 3.16    | -26, 8, 1                              |
|                      | Right cerebellum               | 296                | 0.082                | 3.79    | 21, -58, -48                           |
| FW < NFW             |                                |                    |                      |         |                                        |
|                      | Right ventrolateral prefrontal | 686                | 0.013                | 4.57    | 52, 15, 16                             |
|                      | Right dorsolateral prefrontal  | 572                | 0.021                | 4.12    | 26, 30, 45                             |
|                      | Right medial prefrontal        | 354                | 0.060                | 3.34    | -4, 48, -21 <sup>d</sup>               |
|                      | Left medial prefrontal         | 1343               | 0.001                | 5.46    | -10, 56, -2                            |
|                      | Right temporal                 | 462                | 0.035                | 3.25    | 70, -12, -2                            |
|                      | Right inferior temporal        | 17                 | 0.689                | 2.86    | 45, -64, -18                           |

**Supplemental Digital Content Table S3.** Regional differences in gray matter controlling for age, total intracranial volume, and average butyrylcholinesterase activity.

<sup>a</sup> p-value for comparing farmworkers to non-farmworkers.

<sup>b</sup> MNI (Montreal Neurological Institute) coordinates for peak voxel location.

<sup>c</sup> Indicates that the region in the left putamen was fragmented into many smaller areas. The largest area is noted here.

<sup>d</sup> The region in the right medial prefrontal cortex actually extended into the left hemisphere. The peak location was located on the left but the majority of the area was in the right hemisphere.

FW = farmworker    NFW = non-farmworker

| Statistical Contrast | Region                         | Size (# of voxels) | p-value <sup>a</sup> | T score | MNI coordinates (X, Y, Z) <sup>b</sup> |
|----------------------|--------------------------------|--------------------|----------------------|---------|----------------------------------------|
| FW > NFW             |                                |                    |                      |         |                                        |
|                      | Right putamen                  | 890                | 0.005                | 4.51    | 28, 6, 1                               |
|                      | Left cerebellum                | 1212               | 0.002                | 4.53    | -27, -60, -48                          |
|                      | Cerebellar vermis              | 648                | 0.015                | 3.55    | -3, -39, -14                           |
|                      | Left putamen <sup>c</sup>      | 210                | 0.136                | 3.20    | -27, 9, 3                              |
|                      | Right cerebellum               | 320                | 0.071                | 3.91    | 21, -58, -48                           |
| FW < NFW             |                                |                    |                      |         |                                        |
|                      | Right ventrolateral prefrontal | 668                | 0.013                | 4.44    | 51, 15, 19                             |
|                      | Right dorsolateral prefrontal  | 495                | 0.029                | 3.99    | 26, 30, 45                             |
|                      | Right medial prefrontal        | 336                | 0.065                | 3.47    | -4, 48, -21 <sup>d</sup>               |
|                      | Left medial prefrontal         | 1249               | 0.001                | 5.45    | -9, 56, 1                              |
|                      | Right temporal                 | 448                | 0.037                | 3.12    | 70, -28, -12                           |
|                      | Right inferior temporal        | 8                  | 0.798                | 2.77    | 45, -64, -18                           |

**Supplemental Digital Content Table S4.** Regional differences in gray matter controlling for age, total intracranial volume, and average acetylcholinesterase activity.

<sup>a</sup> p-value for comparing farmworkers to non-farmworkers.

<sup>b</sup> MNI (Montreal Neurological Institute) coordinates for peak voxel location.

<sup>c</sup> Indicates that the region in the left putamen was fragmented into many smaller areas. The largest area is noted here.

<sup>d</sup> The region in the right medial prefrontal cortex actually extended into the left hemisphere. The peak location was located on the left but the majority of the area was in the right hemisphere.

FW = farmworker    NFW = non-farmworker

| Statistical Contrast | Region                         | Size (# of voxels) | p-value <sup>a</sup> | T score | MNI coordinates (X, Y, Z) <sup>b</sup> |
|----------------------|--------------------------------|--------------------|----------------------|---------|----------------------------------------|
| FW > NFW             |                                |                    |                      |         |                                        |
|                      | Right putamen                  | 772                | 0.009                | 4.47    | 28, 6, 3                               |
|                      | Left cerebellum                | 516                | 0.027                | 3.76    | -28, -60, -48                          |
|                      | Cerebellar vermis              | 560                | 0.022                | 3.47    | -4, -37, -14                           |
|                      | Left putamen                   | 180                | 0.166                | 4.40    | -21, -10, 4                            |
|                      | Right cerebellum               | n/a                | n/a                  | n/a     | n/a                                    |
| FW < NFW             |                                |                    |                      |         |                                        |
|                      | Right ventrolateral prefrontal | 1577               | >0.001               | 4.42    | 52, 14, 16                             |
|                      | Right dorsolateral prefrontal  | 1056               | 0.003                | 4.5614  | 24, 32, 45                             |
|                      | Right medial prefrontal        | 854                | 0.006                | 4.13    | 18, 62, -5                             |
|                      | Left medial prefrontal         | 1024               | 0.003                | 5.20    | -14, 56, -2                            |
|                      | Right temporal                 | 31                 | 0.574                | 2.91    | 70, -27, -11                           |
|                      | Right inferior temporal        | 384                | 0.051                | 3.39    | 46, -63, -18                           |

**Supplemental Digital Content Table S5.** Gray matter differences controlling for age, total intracranial volume, urine cotinine, and smoking history.

<sup>a</sup> p-value for comparing farmworkers to non-farmworkers.

<sup>b</sup> MNI (Montreal Neurological Institute) coordinates for peak voxel location.

FW = farmworker NFW = non-farmworker

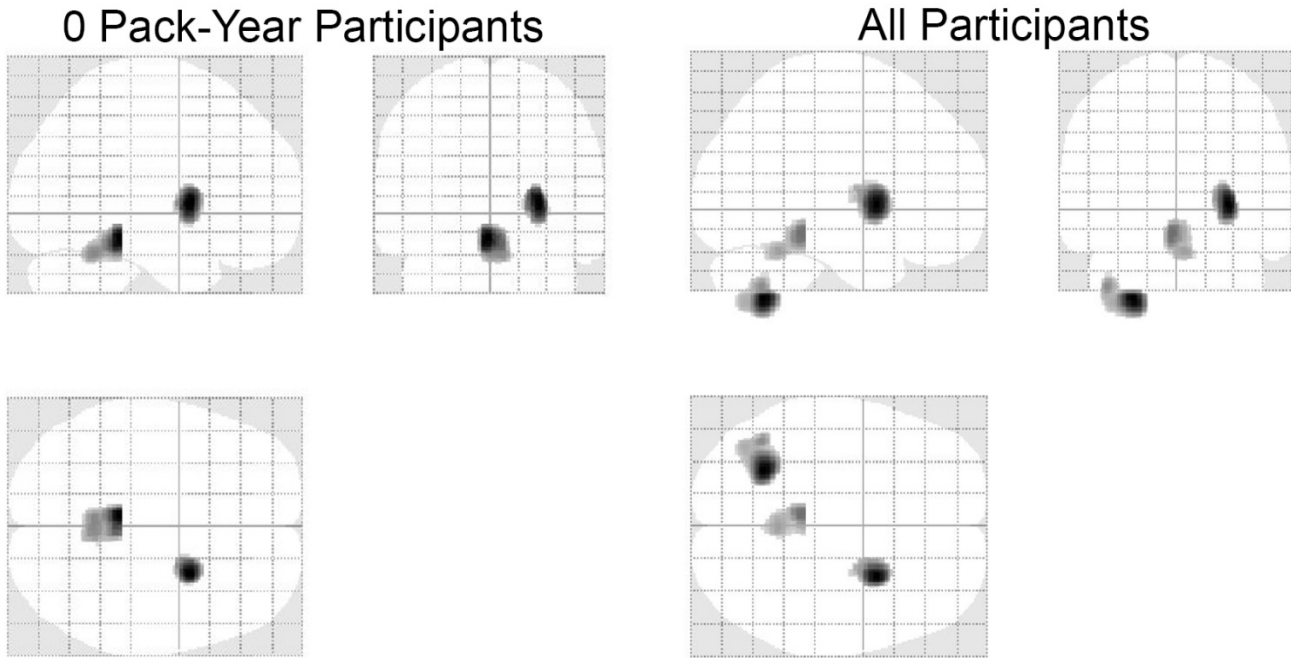

**Supplemental Digital Content Figure S1.** Gray matter differences between farmworkers and non-farmworkers. The left side of the image shows the comparison limited to individuals with zero pack-years smoking history (22 farmworkers and 19 non-farmworkers). For reference purposes, the right figure shows comparisons of all farmworkers ( $n = 48$ ) to non-farmworkers ( $n = 26$ ). Note that the main group differences in the right putamen and the cerebellar vermis were significant even in the reduced sample. The region in the left cerebellum was fragmented into many small areas that did not reach statistical significance. The data in the figure on the right are the same data as in Figure 1 and Table 2 of the main manuscript. The images are “glass brain” projections showing regions of statistical significance after correcting for multiple comparisons. Analyses controlled for age and total intracranial volume.
